# Supplementary material for: Propargylamine: an attractive amine source for designing high-performance benzoxazine resins with low polymerization temperatures
Source: Royal Society of Chemistry journal article supplement (doi:10.1039/d1py01166a), 2021-01-01
Supplement: d1py01166a1.pdf [file d1py01166a1.pdf]

*SUPPORTING INFORMATION*

**Propargylamine: An Attractive Amino Source for Designing High-  
Performance Benzoxazine Resins with Low Polymerization  
Temperatures**

Yu Liu, Weichen Sheng\*, Ren Yin, and Kan Zhang\*

School of Materials Science and Engineering, Jiangsu University, Zhenjiang 212013,  
China

\*: To whom correspondence should be addressed:

E-mails: shengweichen@ujs.edu.cn (W.S.); zhangkan@ujs.edu.cn (K.Z.).

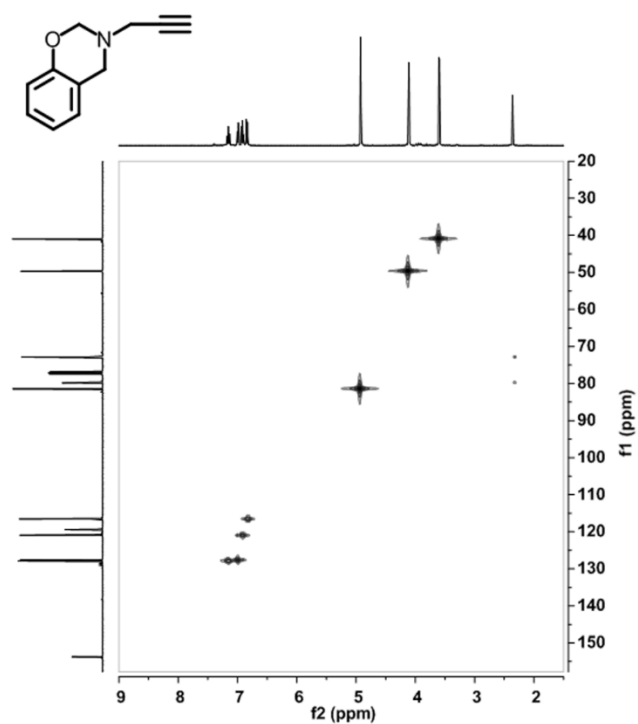

**Figure S1.**  $^1\text{H}$ - $^{13}\text{C}$  HMQC 2D NMR spectrum of PH-pa.

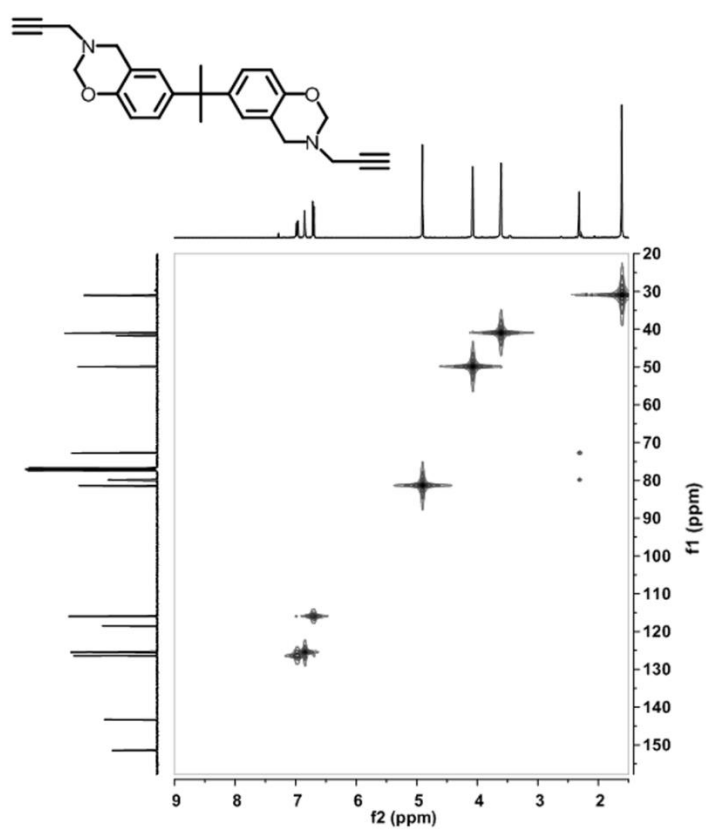

**Figure S2.**  $^1\text{H}$ - $^{13}\text{C}$  HMQC 2D NMR spectrum of BA-pa.

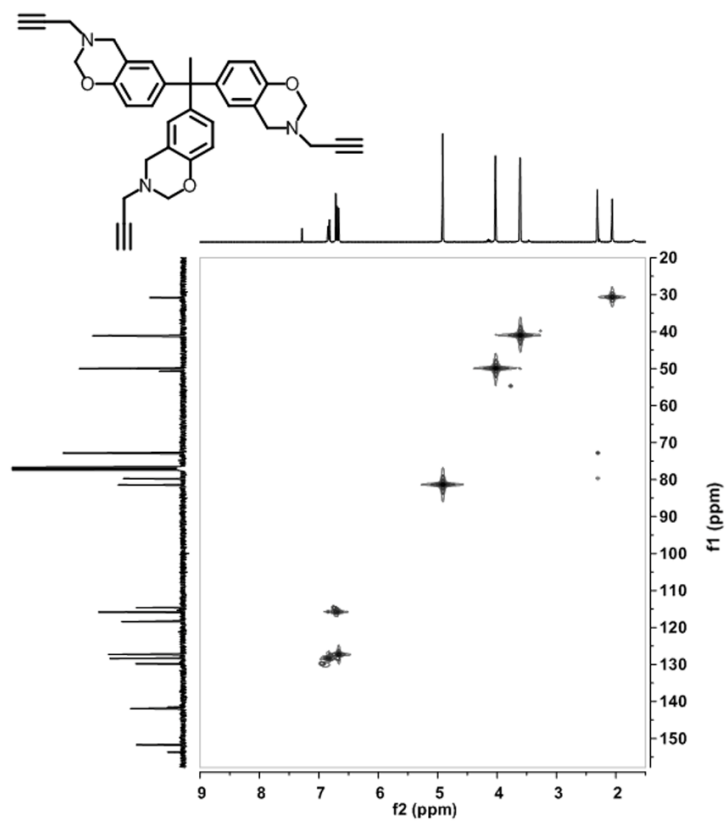

**Figure S3.**  $^1\text{H}$ - $^{13}\text{C}$  HMQC 2D NMR spectrum of TH-pa.

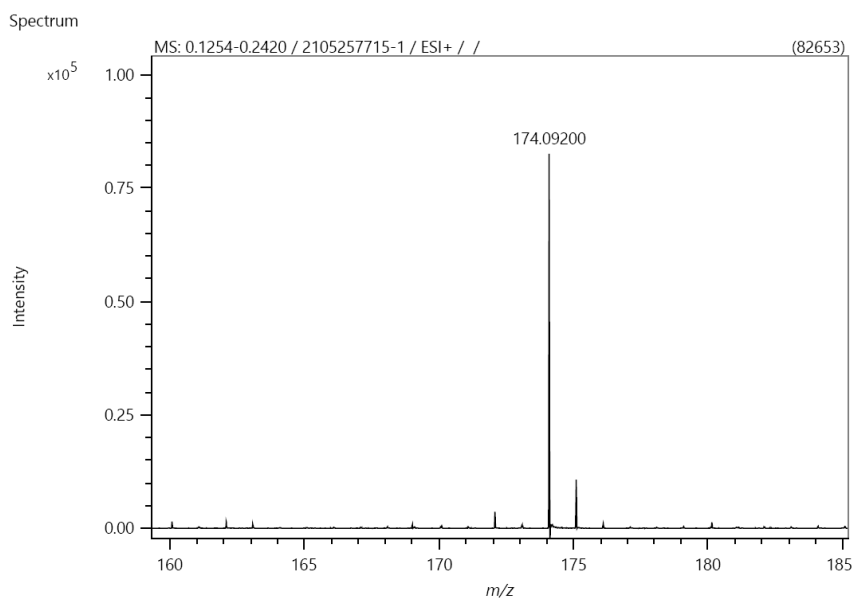

**Figure S4.** HR-MS spectrum of PH-pa.

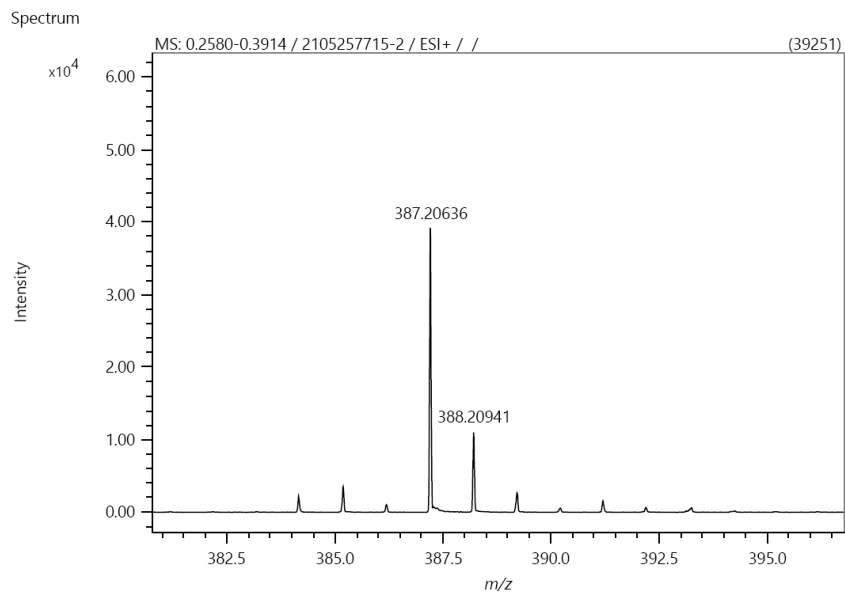

**Figure S5.** HR-MS spectrum of BA-pa.

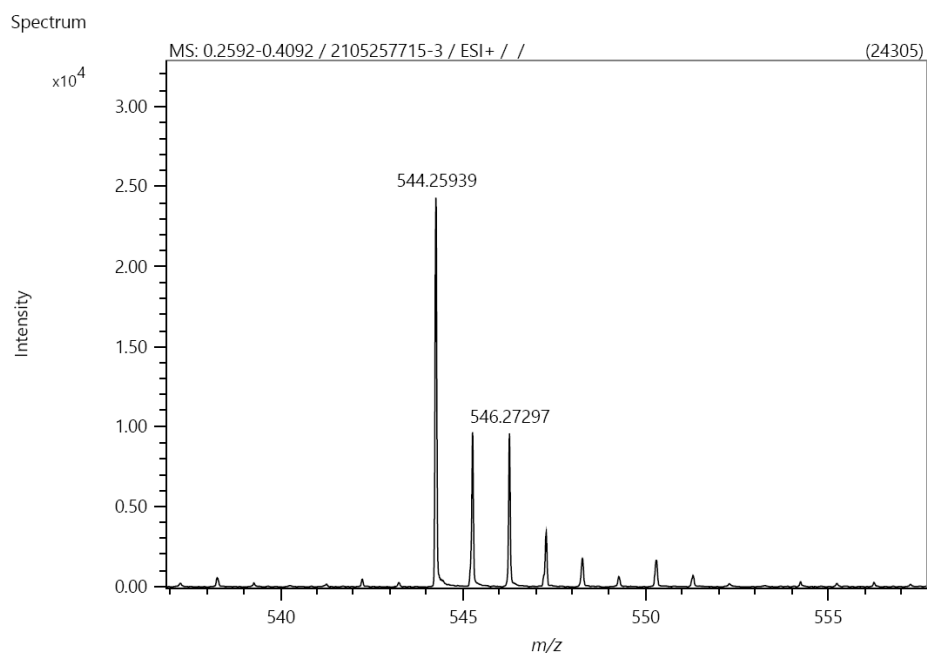

**Figure S6.** HR-MS spectrum of TH-pa.

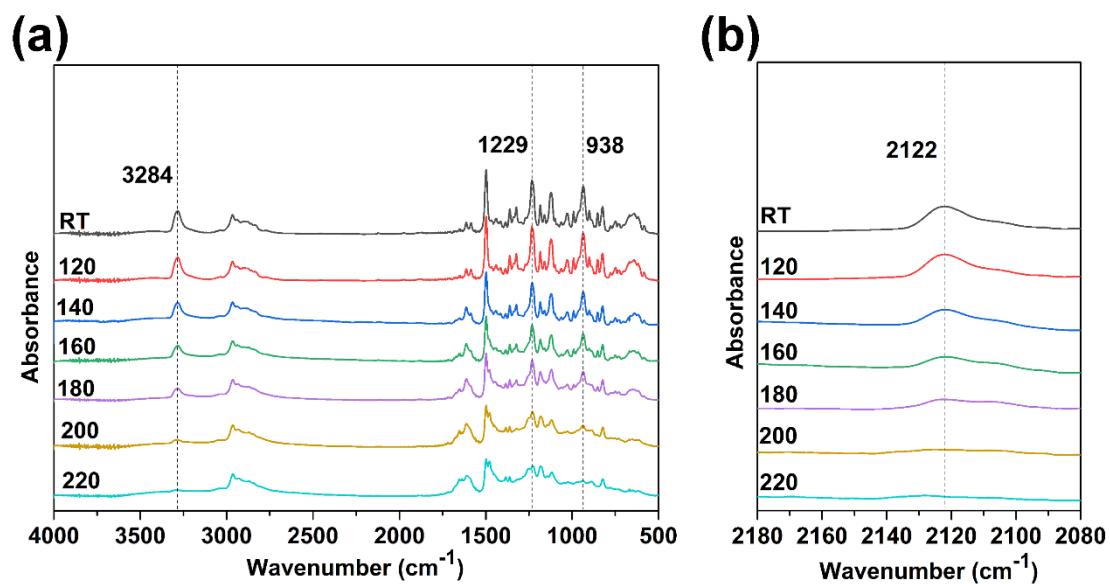

**Figure S7.** (a) FT-IR spectra of BA-pa after various thermal treatments at each designed temperature stage for 1 h. (b) The expanded region between 2180 and 2080 cm<sup>-1</sup> shows the band changes of the stretching vibration of -C≡C from propargyl group.

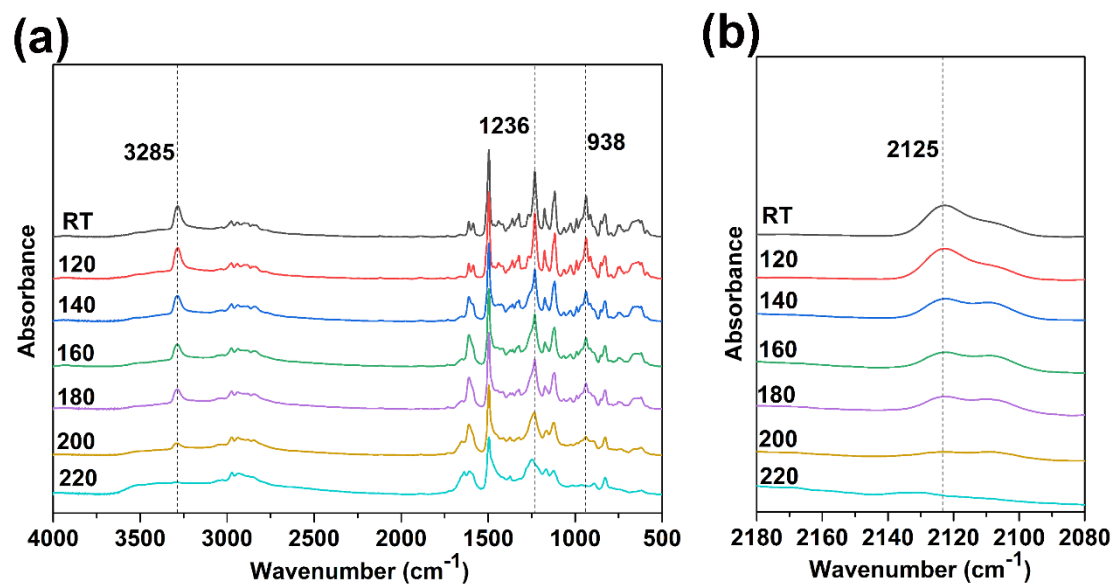

**Figure S8.** (a) FT-IR spectra of TH-pa after various thermal treatments at each designed temperature stage for 1 h. (b) The expanded region between 2180 and 2080 cm<sup>-1</sup> shows the band changes of the stretching vibration of -C≡C from propargyl group.
